# Supplementary material for: Reliable and valid robot-assisted assessments of hand proprioceptive, motor and sensorimotor impairments after stroke
Source: PubMed Central journal article supplement (PMC8283922; doi:10.1186/s12984-021-00904-5), 2021-07-16
Supplement: 12984_2021_904_MOESM1_ESM.pdf [file 12984_2021_904_MOESM1_ESM.pdf]

Reliable and valid robot-assisted assessments of hand  
proprioceptive, motor and sensorimotor impairments after stroke -  
**supplementary material**

Monika Zbytniewska, Christoph M. Kanzler, Lisa Jordan, Christian Salzmann,  
Joachim Liepert, Olivier Lambercy, Roger Gassert

30th of April 2021

Table SM1: Results of each task metric for control subjects (mean and standard deviation) and results of linear mixed effect modelling to find influence of confounds (*p*-values). Model moderate quality: C1  $\leq$  15% and C2  $\leq$  25%; good quality: C1  $\leq$  10% and C2  $\leq$  20%. Acronyms: SD: Standard Deviation; Dom: Dominant; Non-dom: Non-dominant.

| Category     | Metric                      | Mean $\pm$ SD       |                     | Model quality<br>C1(%), C2(%) | Age<br><i>p</i> -val. | Gender<br><i>p</i> -val. | Trial<br><i>p</i> -val. | Task-specific<br><i>p</i> -val. | Tested hand<br><i>p</i> -val. |
|--------------|-----------------------------|---------------------|---------------------|-------------------------------|-----------------------|--------------------------|-------------------------|---------------------------------|-------------------------------|
|              |                             | Dom                 | Non-dom             |                               |                       |                          |                         |                                 |                               |
| Sensory      | AE [ <i>deg</i> ]           | 5.17 $\pm$ 1.97     | 5.21 $\pm$ 2.71     | 11.72, 36.25                  | 0.097                 | 0.602                    | 0.045                   | <0.001                          | 0.608                         |
|              | Vel. Flex. [ <i>deg/s</i> ] | 679.01 $\pm$ 166.96 | 589.48 $\pm$ 128.95 | 6.16, 19.40                   | 0.945                 | <0.001                   | <0.001                  | <0.001                          | <0.001                        |
|              | Vel. Ext. [ <i>deg/s</i> ]  | 435.93 $\pm$ 93.40  | 408.00 $\pm$ 76.20  |                               |                       |                          |                         |                                 |                               |
| Motor        | AROM [ <i>deg</i> ]         | 76.77 $\pm$ 6.18    | 80.90 $\pm$ 8.85    | 7.30, 21.52                   | 0.193                 | 0.097                    | 0.034                   | <0.001                          | <0.001                        |
|              | PROM [ <i>deg</i> ]         | 88.63 $\pm$ 9.05    | 95.54 $\pm$ 11.18   |                               |                       |                          |                         |                                 |                               |
|              | Force Flex. [ <i>N</i> ]    | 38.55 $\pm$ 8.61    | 32.79 $\pm$ 10.93   | 6.76, 21.15                   | 0.005                 | <0.001                   | <0.001                  | <0.001                          | <0.001                        |
|              | Force Ext. [ <i>N</i> ]     | 9.26 $\pm$ 4.55     | 8.89 $\pm$ 4.51     |                               |                       |                          |                         |                                 |                               |
| Sensorimotor | RMSE Slow [ <i>deg</i> ]    | 10.19 $\pm$ 4.13    | 9.35 $\pm$ 2.61     | 7.21, 23.31                   | 0.104                 | 0.497                    | 0.103                   | <0.001                          | 0.968                         |
|              | RMSE Fast [ <i>deg</i> ]    | 10.85 $\pm$ 4.12    | 11.03 $\pm$ 2.92    |                               |                       |                          |                         |                                 |                               |

Table SM2: Test-retest reliability results for all task metrics: **less affected side**. Acronyms: AE: Position Matching Absolute Error; Vel. Flex./Ext.: Maximum Velocity Flexion/ Extension; AROM/PROM: Active/ Passive Range of Motion; Force Flex./Ext.: Maximum Force Flexion/ Extension; RMSE Slow/Fast: Tracking Error RMSE Slow/ Fast; T1: Test; T2: Retest; ICC: Intraclass Correlation Coefficient; SRD: Smallest Real Difference; SRD%: Smallest Real Difference as a percentage of the range of values across all trials; Shift: Systematic Shift; Correlation: Spearman Correlation between Test and Retest.  $p$ -value < 0.05: \*,  $p$ -value < 0.01: \*\*,  $p$ -value < 0.001: \*\*\*.

| Category     | Metric             | Mean ± SD T1    | Mean ± SD T2    | Mean ± SD T2-T1 | ICC(A,k)         | SRD    | SRD(%) | Shift | Correlation |
|--------------|--------------------|-----------------|-----------------|-----------------|------------------|--------|--------|-------|-------------|
| Sensory      | AE [deg]           | 12.08 ± 7.16    | 10.94 ± 6.28    | 3.93 ± 3.84     | 0.81 (0.77-0.83) | 11.39  | 21.35  | -4.01 | 0.60***     |
|              | Vel. Flex. [deg/s] | 399.89 ± 162.35 | 419.79 ± 159.91 | 19.89 ± 173.64  | 0.59 (0.38-0.73) | 317.91 | 40.40  | -3.20 | 0.44*       |
| Motor        | Vel. Ext. [deg/s]  | 299.47 ± 87.09  | 315.00 ± 103.25 | 15.53 ± 75.97   | 0.81 (0.71-0.88) | 116.75 | 22.22  | -3.02 | 0.75***     |
|              | AROM [deg]         | 83.60 ± 12.79   | 81.27 ± 10.82   | -2.34 ± 9.58    | 0.80 (0.70-0.87) | 14.87  | 19.40  | 3.44  | 0.52**      |
|              | PROM [deg]         | 90.12 ± 8.14    | 90.53 ± 7.58    | 0.40 ± 6.61     | 0.79 (0.68-0.86) | 10.38  | 19.36  | -0.85 | 0.66***     |
|              | Force Flex. [N]    | 27.18 ± 13.35   | 27.50 ± 10.27   | 0.32 ± 8.49     | 0.86 (0.78-0.91) | 12.65  | 24.92  | -0.64 | 0.74***     |
|              | Force Ext. [N]     | 9.27 ± 5.16     | 7.90 ± 3.53     | -1.38 ± 3.64    | 0.79 (0.68-0.86) | 5.79   | 26.79  | 7.27  | 0.78***     |
| Sensorimotor | RMSE Slow [deg]    | 12.58 ± 5.30    | 11.68 ± 4.25    | -1.07 ± 3.91    | 0.83 (0.74-0.89) | 5.76   | 23.38  | -4.97 | 0.58***     |
|              | RMSE Fast [deg]    | 14.05 ± 5.05    | 12.68 ± 4.47    | -1.37 ± 2.99    | 0.89 (0.82-0.93) | 4.79   | 20.09  | -7.24 | 0.53***     |

Table SM3: Validity and feasibility results for all task metrics: **less affected side**. Acronyms: AE: Position Matching Absolute Error; Vel. Flex./Ext.: Maximum Velocity Flexion/ Extension; AROM/PROM: Active/ Passive Range of Motion; Force Flex./Ext.: Maximum Force Flexion/ Extension; RMSE Slow/Fast: Tracking Error RMSE Slow/ Fast; AUC: Area Under the Curve of the Receiver Operating Characteristic; C: control; A: affected side; LA: less-affected side; paired t-test: reported values are [t-statistic, p-value]; % impaired: % of stroke subjects classified as impaired according to z-scores; T1: test.

| Category     | Metric                      | AUC (C vs LA) | AUC (A vs LA) | paired t-test (A vs LA) | % impaired | Time T1 [min] |
|--------------|-----------------------------|---------------|---------------|-------------------------|------------|---------------|
| Sensory      | AE [ <i>deg</i> ]           | 0.82          | 0.61          | [1.84, 0.077]           | 56.67      | 4.08 ± 1.75   |
|              | Vel. Flex. [ <i>deg/s</i> ] | 0.85          | 0.62          | [1.93, 0.064]           | 60.00      | 3.33 ± 0.43   |
| Motor        | Vel. Ext. [ <i>deg/s</i> ]  | 0.85          | 0.79          | [5.17, 1.56e-05]        | 53.33      |               |
|              | AROM [ <i>deg</i> ]         | 0.38          | 0.85          | [6.51, 3.98e-07]        | 3.33       | 1.35 ± 0.29   |
|              | PROM [ <i>deg</i> ]         | 0.55          | 0.66          | [3.67, 9.71e-04]        | 3.33       |               |
|              | Force Flex. [ <i>N</i> ]    | 0.70          | 0.82          | [5.79, 2.81e-06]        | 33.33      | 1.38 ± 0.29   |
|              | Force Ext. [ <i>N</i> ]     | 0.50          | 0.78          | [5.19, 1.50e-05]        | 13.33      |               |
| Sensorimotor | RMSE Slow [ <i>deg</i> ]    | 0.66          | 0.81          | [5.40, 8.37e-06]        | 23.33      | 3.95 ± 0.56   |
|              | RMSE Fast [ <i>deg</i> ]    | 0.70          | 0.80          | [4.82, 4.12e-05]        | 20.00      |               |

Table SM4: Demographic and clinical data per stroke subject recruited in the study. Acronyms: A: Affected side; LA: Less Affected side; FMA: Fugl-Meyer Upper Limb Motor Assessment; kUDT: kinesthetic Up-Down Test; BBT: Box & Block Test; MoCA: Montreal Cognitive Assessment; MAS: Modified Ashworth Scale. There is missing data for subject 20, who dropped out of the study early, hence not all data was collected.

| ID | Age | Gender | Affected side | Handedness | Weeks since stroke | Type of stroke | FMA | kUDT | BBT-A | BBT-LA | MoCA | MAS | MAS Included? |
|----|-----|--------|---------------|------------|--------------------|----------------|-----|------|-------|--------|------|-----|---------------|
| 1  | 71  | Female | Left          | Right      | 9.57               | Ischemic       | 4   | 0    | 0     | 46     | 23   | 0   | Yes           |
| 2  | 53  | Male   | Right         | Left       | 6.43               | Hemorrhagic    | 45  | 1    | 33    | 72     | 24   | 0   | Yes           |
| 3  | 64  | Male   | Right         | Right      | 4.71               | Ischemic       | 19  | 0    | 4     | 50     | 7    | 0   | Yes           |
| 4  | 73  | Male   | Left          | Right      | 26.00              | Hemorrhagic    | 36  | 0    | 11    | 50     | 19   | 0   | No            |
| 5  | 70  | Female | Right         | Right      | 98.00              | Hemorrhagic    | 32  | 0    | 23    | 54     | 23   | 0   | Yes           |
| 6  | 43  | Female | Left          | Right      | 8.29               | Hemorrhagic    | 64  | 2    | 42    | 73     | 23   | 0   | Yes           |
| 7  | 64  | Male   | Right         | Right      | 3.86               | Ischemic       | 48  | 1    | 37    | 55     | 10   | 0   | Yes           |
| 8  | 76  | Male   | Right         | Right      | 4.86               | Ischemic       | 5   | 2    | 0     | 55     | 19   | 0   | Yes           |
| 9  | 81  | Male   | Right         | Right      | 7.14               | Ischemic       | 61  | 2    | 34    | 61     | 17   | 0   | No            |
| 10 | 82  | Male   | Left          | Right      | 3.86               | Ischemic       | 4   | 0    | 0     | 51     | 25   | 0   | No            |
| 11 | 66  | Male   | Right         | Left       | 10.14              | Ischemic       | 24  | 2    | 9     | 50     | 26   | 0   | Yes           |
| 12 | 60  | Female | Left          | Right      | 13.29              | Hemorrhagic    | 59  | 2    | 30    | 62     | 24   | 0   | Yes           |
| 13 | 62  | Male   | Left          | Right      | 5.00               | Hemorrhagic    | 62  | 0    | 25    | 72     | 29   | 0   | Yes           |
| 14 | 48  | Male   | Left          | Right      | 5.71               | Ischemic       | 65  | 1    | 74    | 80     | 28   | 0   | Yes           |
| 15 | 63  | Female | Left          | Right      | 4.57               | Hemorrhagic    | 4   | 0    | 0     | 69     | 25   | 0   | Yes           |
| 16 | 29  | Female | Left          | Right      | 9.43               | Hemorrhagic    | 19  | 0    | 2     | 63     | 25   | 0   | Yes           |
| 17 | 70  | Female | Left          | Right      | 12.14              | Ischemic       | 26  | 1    | 7     | 58     | 19   | 0   | Yes           |
| 18 | 69  | Female | Right         | Right      | 8.14               | Ischemic       | 60  | 2    | 60    | 72     | 22   | 0   | Yes           |
| 19 | 49  | Female | Left          | Right      | 7.14               | Ischemic       | 16  | 2    | 0     | 80     | 24   | 0   | Yes           |
| 20 | -   | Female | -             | -          | -                  | -              | 2   | 1    | -     | -      | 18   | 0   | No            |
| 21 | 75  | Female | Left          | Right      | 8.14               | Ischemic       | 42  | 2    | 23    | 74     | 27   | 0   | Yes           |
| 22 | 74  | Male   | Left          | Right      | 14.71              | Ischemic       | 37  | 2    | 30    | 44     | 27   | 0   | Yes           |
| 23 | 76  | Female | Right         | Right      | 2.57               | Hemorrhagic    | 63  | 2    | 41    | 37     | 18   | 0   | No            |
| 24 | 57  | Male   | Left          | Left       | 3.43               | Ischemic       | 4   | 2    | 0     | 56     | 17   | 0   | Yes           |
| 25 | 54  | Male   | Left          | Right      | 20.86              | Ischemic       | 47  | 0    | 17    | 57     | 30   | 0   | Yes           |
| 26 | 81  | Male   | Left          | Right      | 17.14              | Ischemic       | 65  | 2    | 47    | 49     | 22   | 0   | Yes           |
| 27 | 78  | Male   | Left          | Right      | 4.43               | Ischemic       | 16  | 2    | 0     | 51     | 20   | 0   | Yes           |
| 28 | 68  | Male   | Right         | Right      | 17.00              | Hemorrhagic    | 40  | 2    | 29    | 61     | 28   | 0   | Yes           |
| 29 | 80  | Male   | Right         | Right      | 8.29               | Ischemic       | 49  | 1    | 32    | 76     | 17   | 0   | Yes           |
| 30 | 76  | Male   | Right         | Right      | 2.86               | Ischemic       | 4   | 1    | 0     | 47     | 6    | 3   | Yes           |
| 31 | 63  | Male   | Left          | Right      | 3.57               | Ischemic       | 63  | 2    | 46    | 66     | 27   | 0   | No            |
| 32 | 68  | Male   | Left          | Right      | 6.71               | Ischemic       | 4   | 1    | 0     | 45     | 20   | 0   | Yes           |
| 33 | 29  | Male   | Right         | Right      | 2.57               | Hemorrhagic    | 63  | 2    | 26    | 48     | 28   | 0   | Yes           |
| 34 | 71  | Female | Right         | Right      | 5.29               | Ischemic       | 50  | 1    | 52    | 78     | 22   | 0   | Yes           |
| 35 | 83  | Male   | Left          | Left       | 7.14               | Ischemic       | 56  | 0    | 25    | 56     | 22   | 0   | Yes           |
| 36 | 84  | Male   | Left          | Right      | 5.00               | Ischemic       | 4   | 2    | 0     | 56     | 23   | 0   | Yes           |

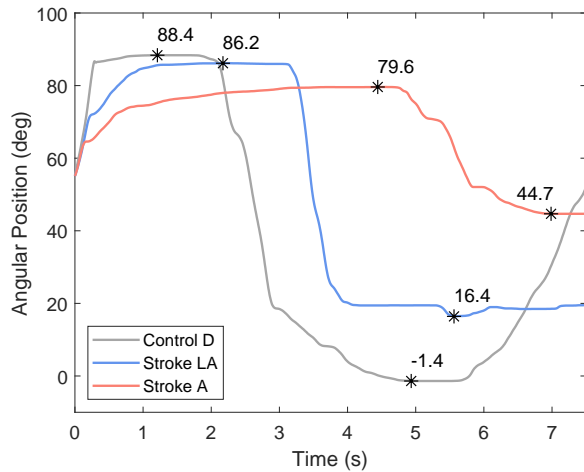

(a) Representative position profiles

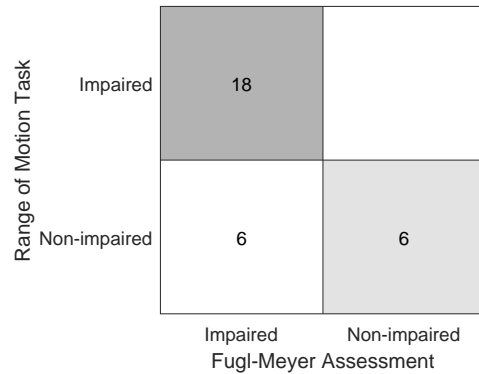

(b) Impairment classification matrix

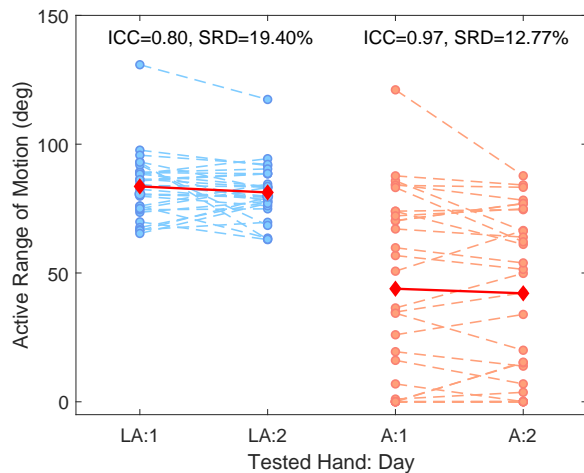

(c) Test-retest reliability

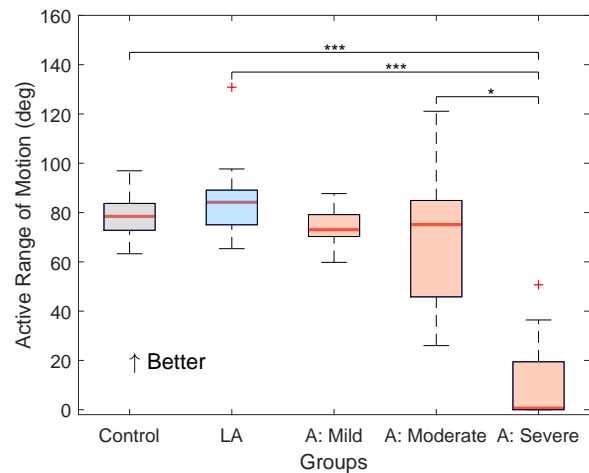

(d) Discriminant validity

Figure SM1: **Range of motion (active) task for the assessment of motor impairments.** a) Subjects are asked to move to maximum position in flexion and then in extension. The outcome measure is the difference in angular position between these two extremes. b) There is a high agreement (83%) in impairment classification between the task metric and the FMA. c) The task has good reliability ( $ICC > 0.70$ ) on the less affected side and excellent reliability ( $ICC > 0.90$ ) on the affected side. d) The box plot indicates a trend of decreasing performance with increasing stroke severity (mild:  $FMA \geq 54$ , moderate:  $54 > FMA \geq 35$ , severe:  $FMA < 35$ ). There is a significant difference between controls ( $N=62$ ) and severely impaired stroke subjects ( $N=14$ ), as well as between moderately ( $N=8$ ) and severely impaired stroke subgroups. Acronyms: D: dominant, LA: less affected, A: affected, FMA: Fugl-Meyer Upper Limb Motor Assessment, ICC: intraclass correlation coefficient, SRD: smallest real difference. Statistical significance:  $p$ -value  $< 0.05$ : \*,  $p$ -value  $< 0.01$ : \*\*,  $p$ -value  $< 0.001$ : \*\*\*.

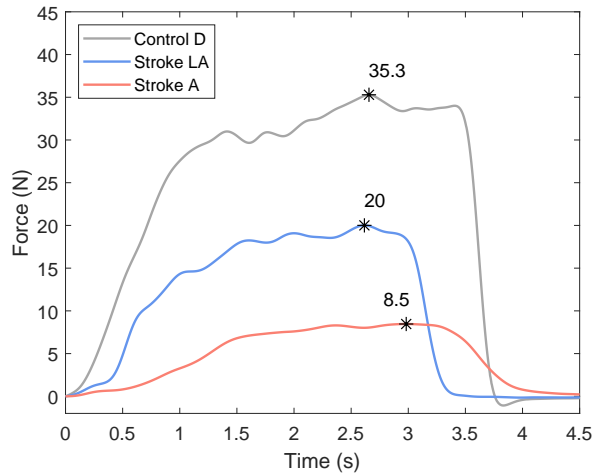

(a) Representative force profiles

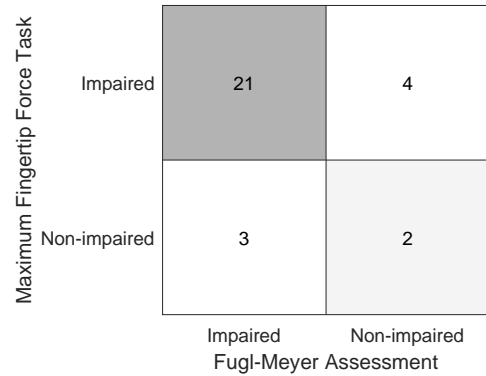

(b) Impairment classification matrix

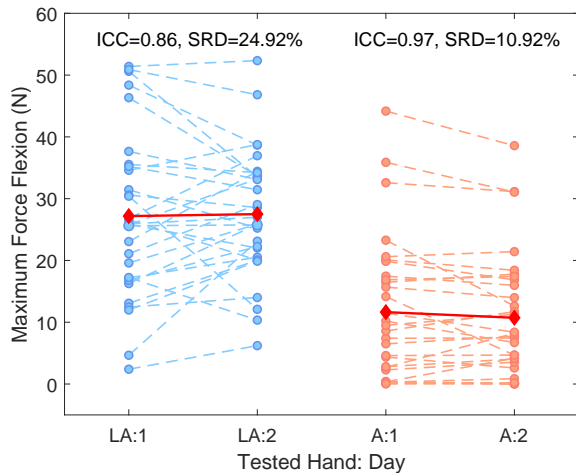

(c) Test-retest reliability

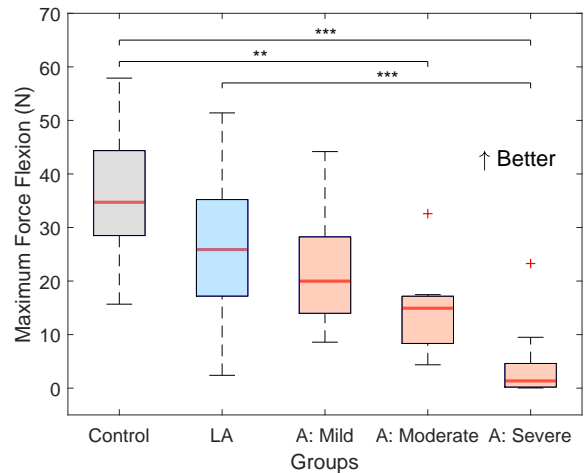

(d) Discriminant validity

Figure SM2: **Maximum fingertip force (flexion) task for the assessment of motor impairments.** a) Subjects are instructed to flex the finger as hard as possible against the fixated end-effector. Maximum fingertip force generated in flexion is the outcome measure for this task. b) There is a high agreement (80%) in impairment classification between the task metric and the FMA. c) The task metric has good reliability ( $ICC > 0.70$ ) on the less affected and excellent reliability ( $ICC > 0.90$ ) on the more affected side. d) The box plot indicates decreasing performance with increasing stroke severity (mild:  $FMA \geq 54$ , moderate:  $54 > FMA \geq 35$ , severe:  $FMA < 35$ ). There is a significant difference between controls ( $N=62$ ) and severely ( $N=14$ ), as well as moderately ( $N=8$ ) impaired stroke subgroups. Acronyms: D: dominant, LA: less affected, A: affected, FMA: Fugl-Meyer Upper Limb Motor Assessment, ICC: intraclass correlation coefficient, SRD: smallest real difference. Statistical significance:  $p$ -value  $< 0.05$ : \*,  $p$ -value  $< 0.01$ : \*\*,  $p$ -value  $< 0.001$ : \*\*\*.

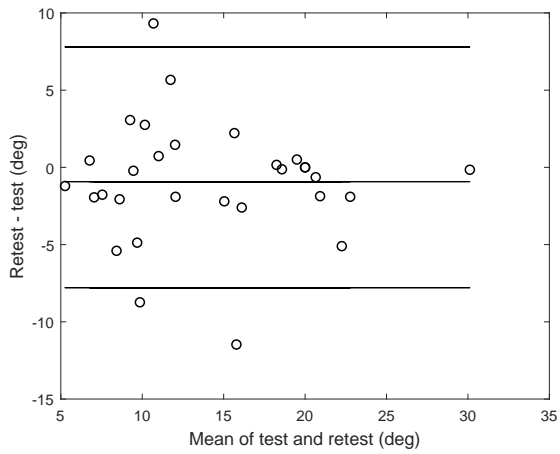

(a) Absolute Error; more-affected side

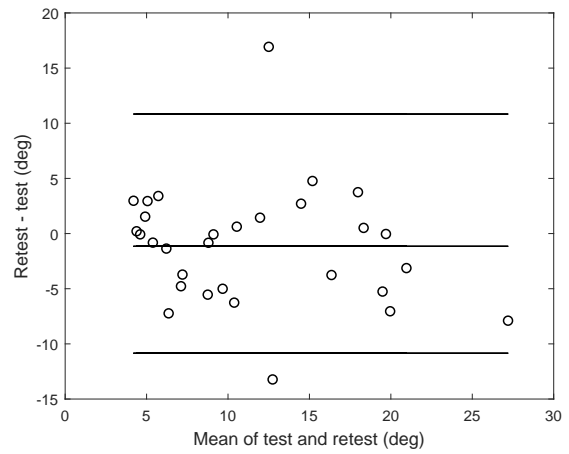

(b) Absolute Error; less-affected side

Figure SM3: **Gauge position matching task** (proprioceptive impairments assessment): Bland-Altman plots used to compare Position Matching Absolute Error on test and retest, as another measure of test-retest reliability. The plots indicate the presence of any systematic biases / learning effects between test and retest measurements. The middle horizontal line is the mean difference between test and retest, the two other horizontal lines are the limits of agreement.



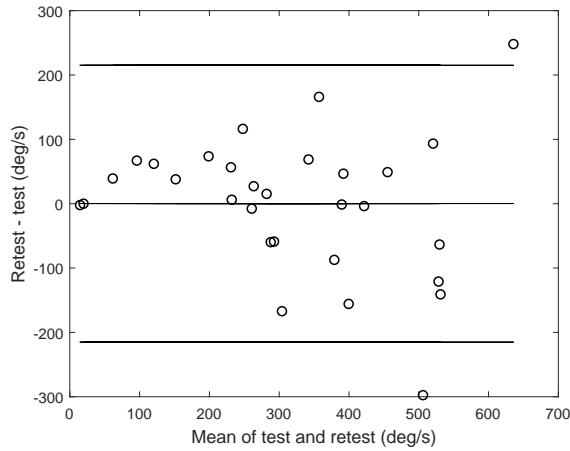

(a) Flexion; more-affected side

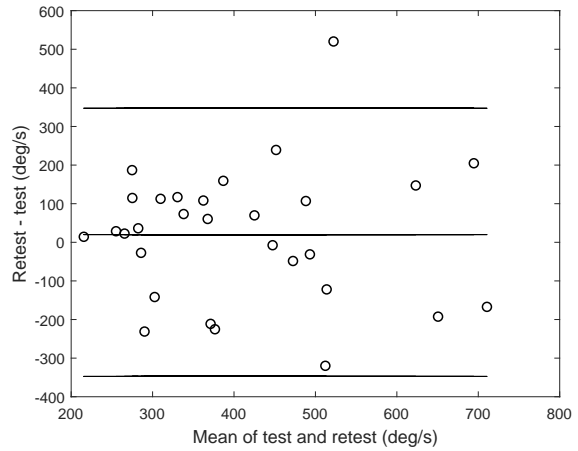

(b) Flexion; less-affected side

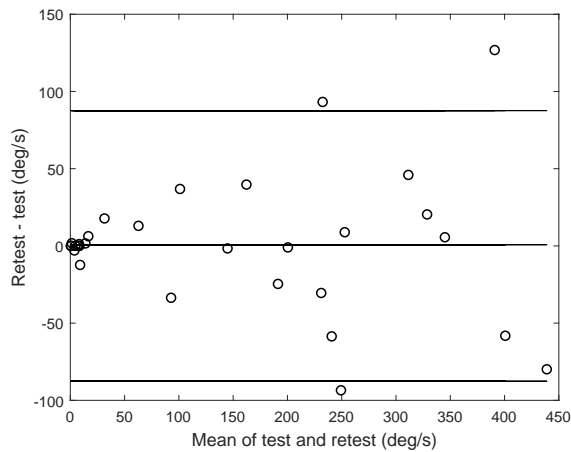

(c) Extension; more-affected side

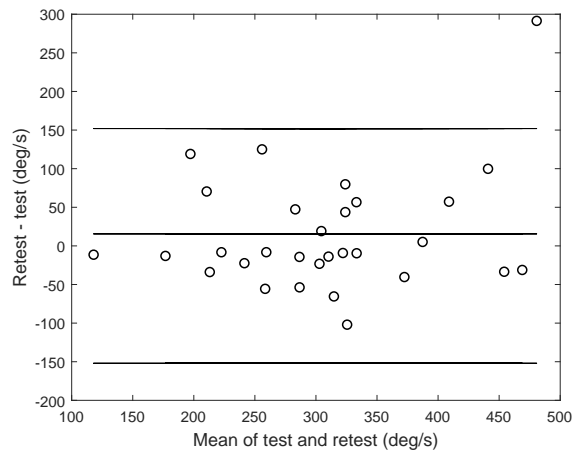

(d) Extension; less-affected side

Figure SM4: **Fast target reaching task** (motor impairments assessment): Bland-Altman plots used to compare Maximum Velocity (Flexion/Extension) on test and retest, as another measure of test-retest reliability. The plots indicate the presence of any systematic biases / learning effects between test and retest measurements. The middle horizontal line is the mean difference between test and retest, the two other horizontal lines are the limits of agreement.

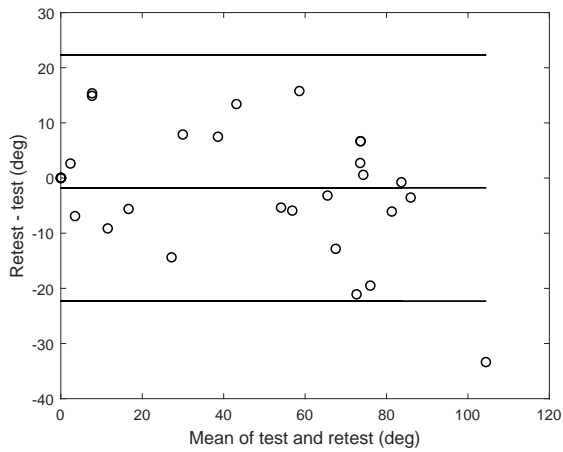

(a) Active Range of Motion; more-affected side

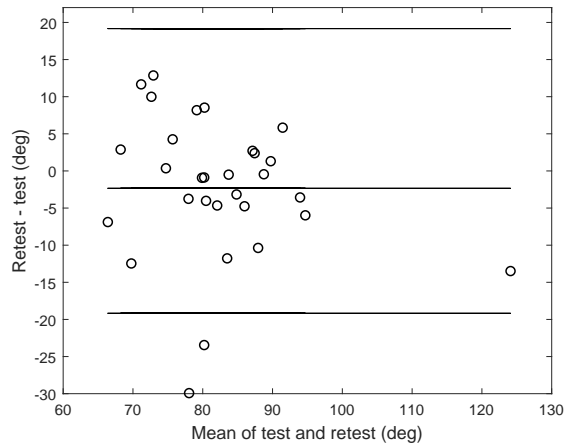

(b) Active Range of Motion; less-affected side

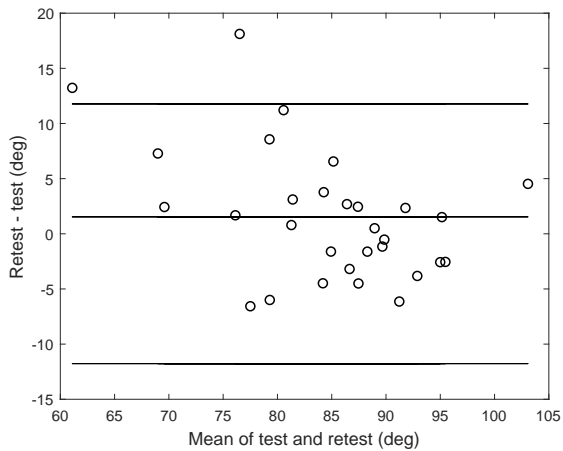

(c) Passive Range of Motion; more-affected side

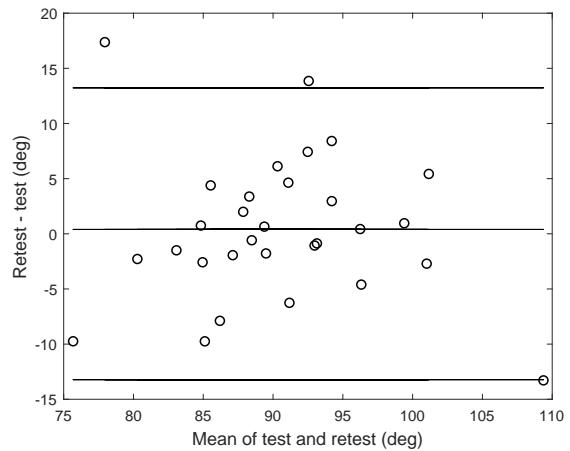

(d) Passive Range of Motion; less-affected side

Figure SM5: **Range of Motion task** (motor impairments assessment): Bland-Altman plots used to compare Active/Passive Range of Motion on test and retest, as another measure of test-retest reliability. The plots indicate the presence of any systematic biases / learning effects between test and retest measurements. The middle horizontal line is the mean difference between test and retest, the two other horizontal lines are the limits of agreement.

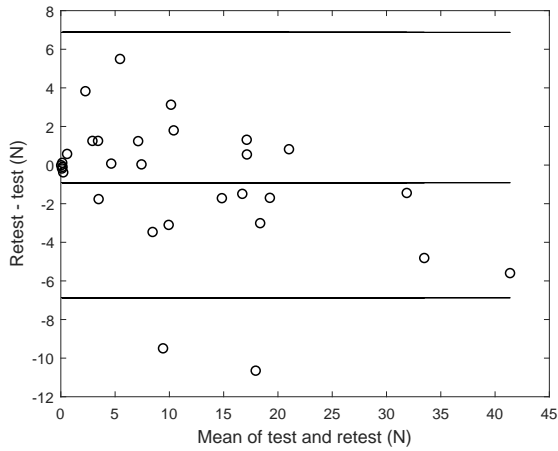

(a) Flexion; more-affected side

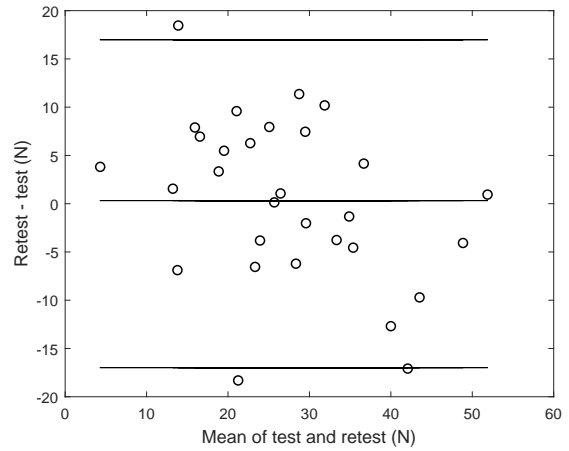

(b) Flexion; less-affected side

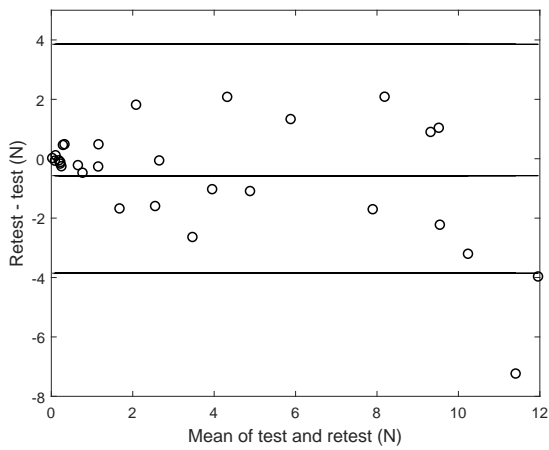

(c) Extension; more-affected side

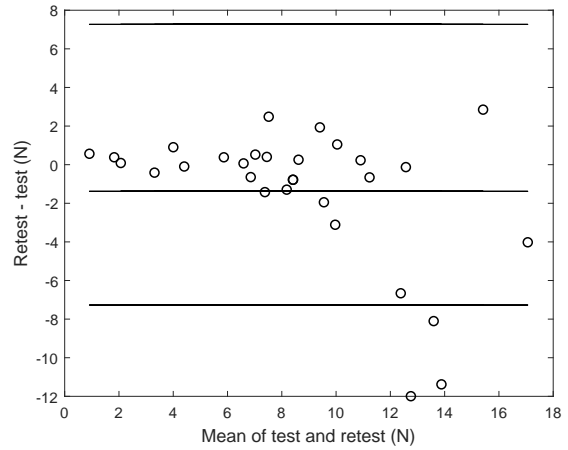

(d) Extension; less-affected side

Figure SM6: **Maximum fingertip force task** (motor impairments assessment): Bland-Altman plots used to compare Maximum Force (Flexion/Extension) on test and retest, as another measure of test-retest reliability. The plots indicate the presence of any systematic biases / learning effects between test and retest measurements. The middle horizontal line is the mean difference between test and retest, the two other horizontal lines are the limits of agreement.

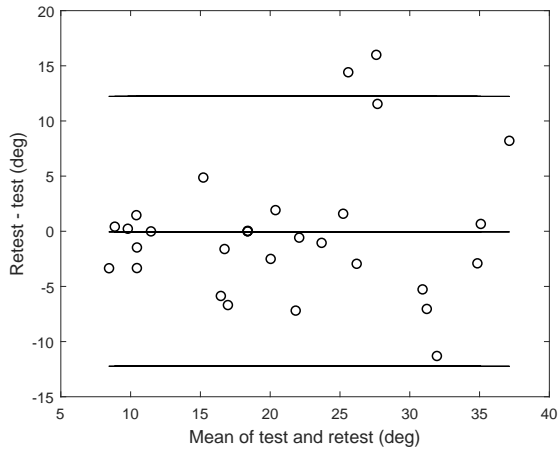

(a) Slow tracking; more-affected side

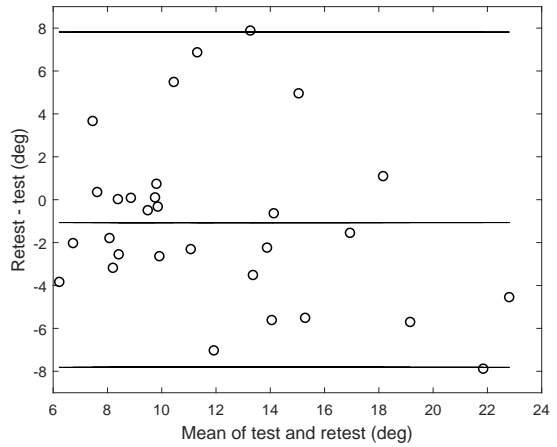

(b) Slow tracking; less-affected side

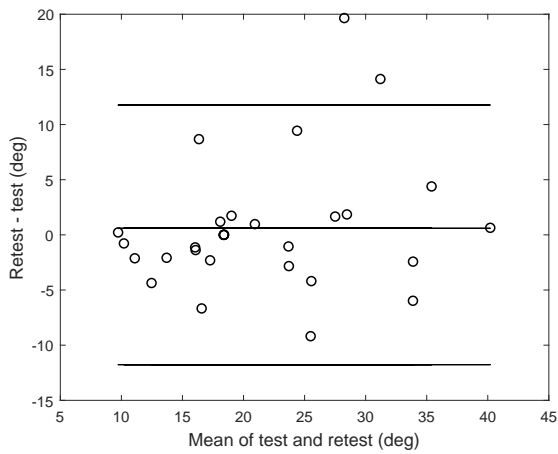

(c) Fast tracking; more-affected side

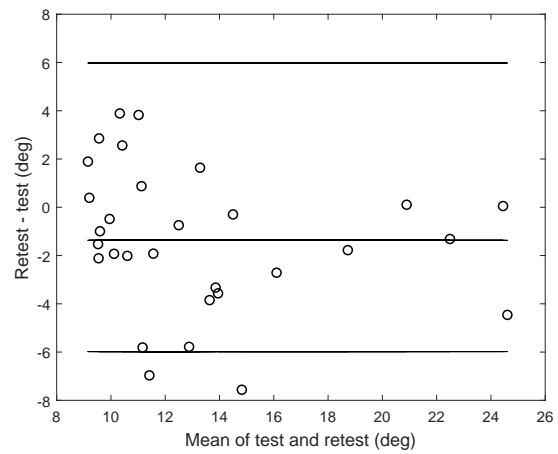

(d) Fast tracking; less-affected side

Figure SM7: **Trajectory following task** (sensorimotor impairments assessment): Bland-Altman plots used to compare Tracking Error RMSE (Slow/Fast) on test and retest, as another measure of test-retest reliability. The plots indicate the presence of any systematic biases / learning effects between test and retest measurements. The middle horizontal line is the mean difference between test and retest, the two other horizontal lines are the limits of agreement.

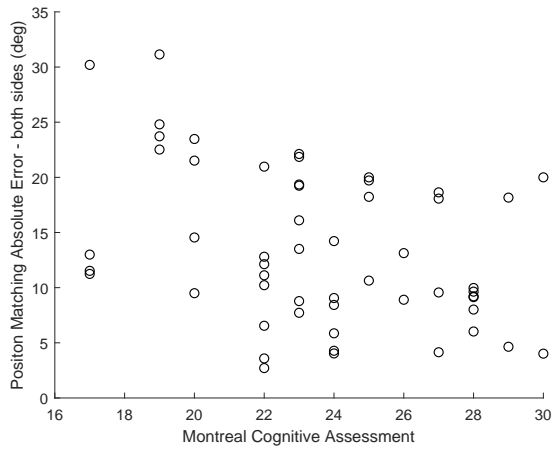

(a) MoCA vs Position Matching Absolute Error

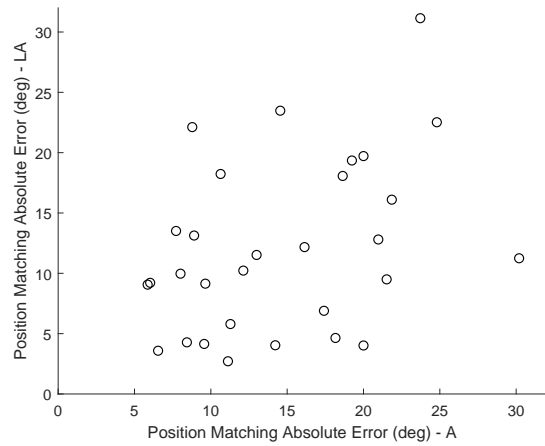

(b) Less vs more affected side

Figure SM8: **Gauge position matching task** (proprioceptive impairments assessment): a) Correlation of Position Matching Absolute Error with Montreal Cognitive Assessment (Spearman  $\rho=0.386, p\text{-value}=0.0036$ ). b) Correlation between the less and more affected side of stroke subjects (Spearman  $\rho=0.364, p\text{-value}=0.048$ ). Abbreviations: A-affected side, LA-less affected side.
